# Supplementary material
Source: Elsevier journal article supplement (https://www.sciencedirect.com/science/article/pii/S2174204918302745)
Supplement: mmc2 [file S2174204918302745:mmc2.docx]

**Supplementary Material**

**Supplementary Figure 1.** Transesophageal 3D echocardiography, which shows a 5-6mm vegetation on the backside of the aortic prosthesis in systole and diastole.
